# Supplementary material for: Beta-Catenin Signaling Plays a Disparate Role in Different Phases of Fracture Repair: Implications for Therapy to Improve Bone Healing
Source: PubMed Central journal article supplement (PMC1950214; doi:10.1371/journal.pmed.0040249), 2007-07-31

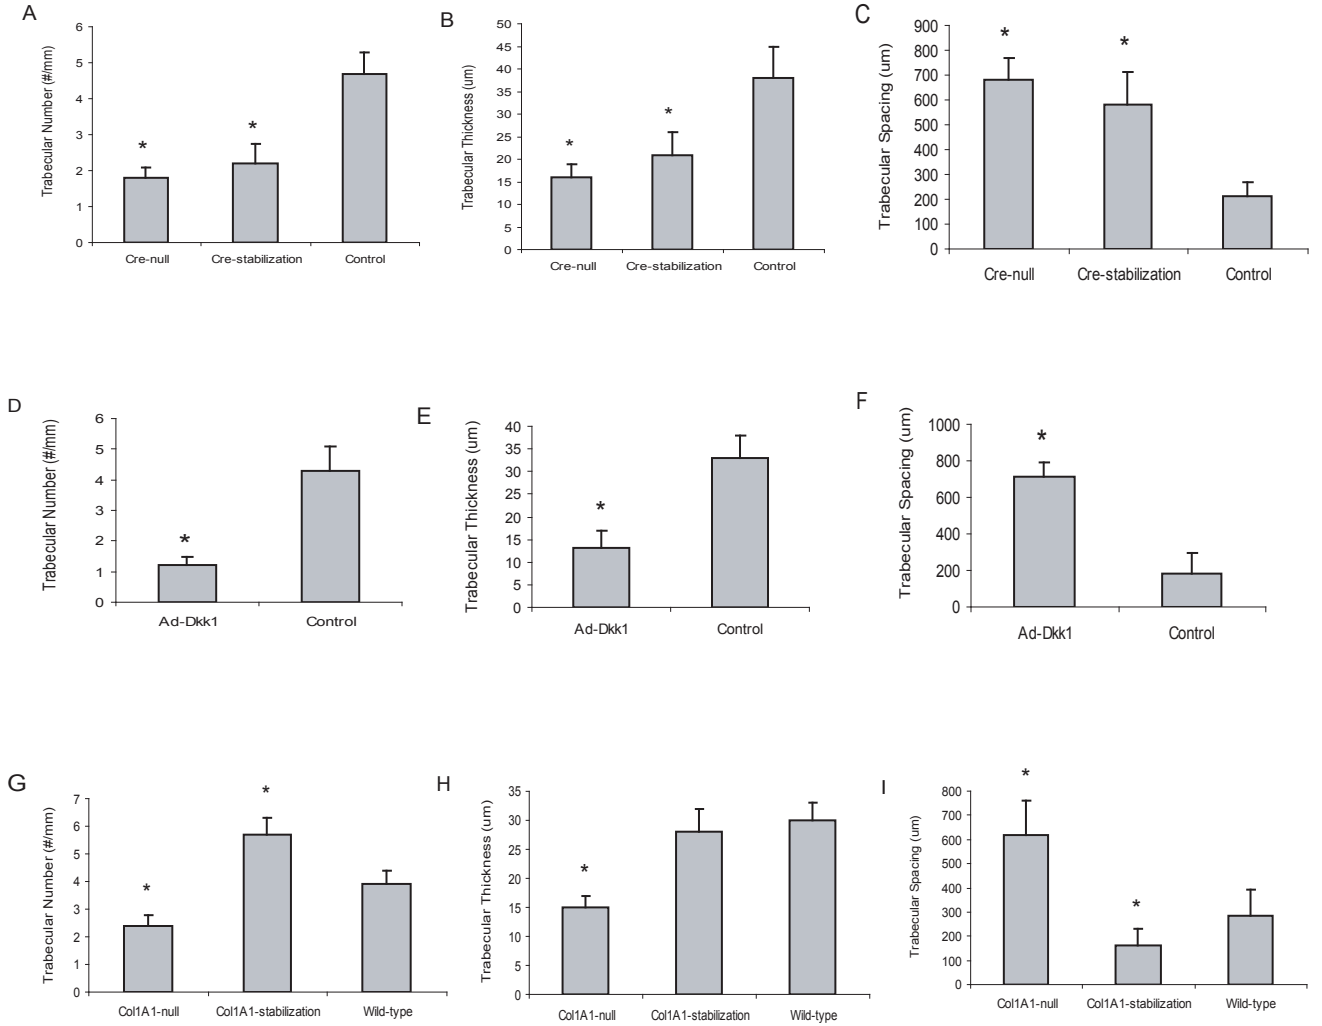

Supplement: pmed.0040249.sg001.pdf [file pmed.0040249.sg001.pdf]
